# Supplementary material for: Variation of fatty acid desaturation in response to different nitrate levels in Auxenochlorella pyrenoidosa
Source: PubMed Central journal article supplement (PMC6281909; doi:10.1098/rsos.181236), 2018-11-28

1. Relative gene expression of  $\Delta 9$ FAD,  $\Delta 12$ FAD and  $\Delta 15$ FAD under nitrate absence and nitrate replenishment

|         | Nitrate absence |      |      | Nitrate replenishment |      |     |
|---------|-----------------|------|------|-----------------------|------|-----|
| delta9  | 147             | 99   | 99   | 1                     | 1    | 1   |
| delta12 | 96.7            | 65.1 | 65.1 | 3.2                   | 2.7  | 3.6 |
| delta15 | 26.1            | 17.6 | 17.6 | 2.9                   | 1.95 | 2.5 |

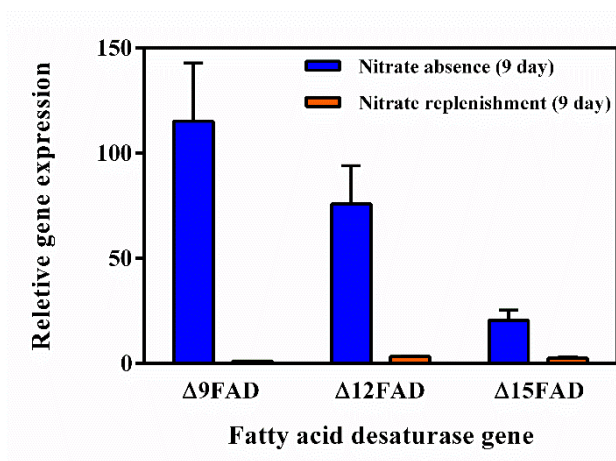

2. Relative gene expression in response to different nitrate concentrations. The expressions of three genes  $\Delta 9$ FAD (a),  $\Delta 12$ FAD (b) and  $\Delta 15$ FAD (c) in three different growth phases lag (Lag), logarithmic (Log) and stationary phase (S) were detected by real time PCR.

Delta 9 FAD

|             | 0 g L <sup>-1</sup> |       |      | 1.5 g L <sup>-1</sup> |      |       |
|-------------|---------------------|-------|------|-----------------------|------|-------|
| lag         | 1                   | 1     | 1    | 0.28                  | 0.22 | 0.34  |
| logarithmic | 3.07                | 3.39  | 3.44 | 0.73                  | 0.57 | 0.886 |
| stationary  | 3.458               | 2.034 | 1.85 | 1.22                  | 0.96 | 1.49  |

Delta 12 FAD

|             | 0 g L <sup>-1</sup> |       |      | 1.5 g L <sup>-1</sup> |       |         |
|-------------|---------------------|-------|------|-----------------------|-------|---------|
| lag         | 1                   | 1     | 1    | 0.1207                | 0.04  | 0.06    |
| logarithmic | 1.301               | 1.11  | 1.09 | 0.178                 | 0.059 | 0.08805 |
| stationary  | 0.666               | 0.965 | 0.75 | 0.37                  | 0.125 | 0.188   |

Delta 15 FAD

|             | 0 g L <sup>-1</sup> |      |       | 1.5 g L <sup>-1</sup> |        |        |
|-------------|---------------------|------|-------|-----------------------|--------|--------|
| lag         | 1                   | 1    | 1     | 0.148                 | 0.186  | 0.05   |
| logarithmic | 0.927               | 0.83 | 0.841 | 0.2294                | 0.2883 | 0.0775 |
| stationary  | 0.66                | 0.48 | 0.463 | 0.43                  | 0.54   | 0.14   |

(a)

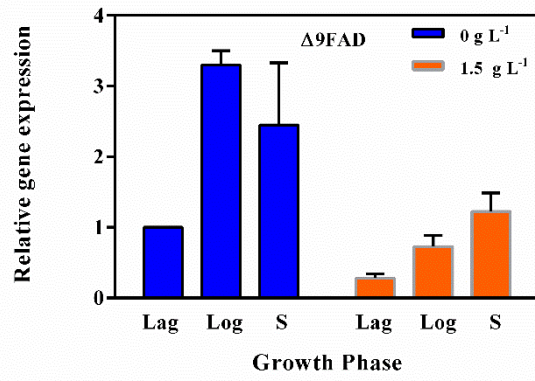

(b)

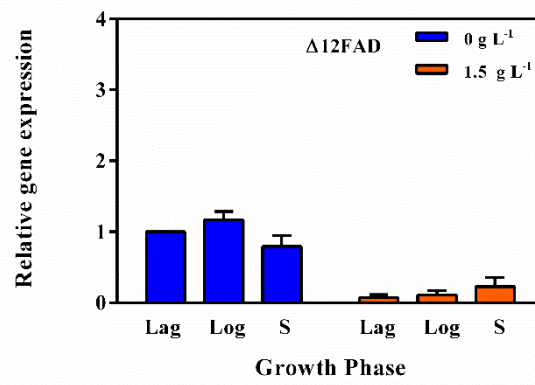

(c)

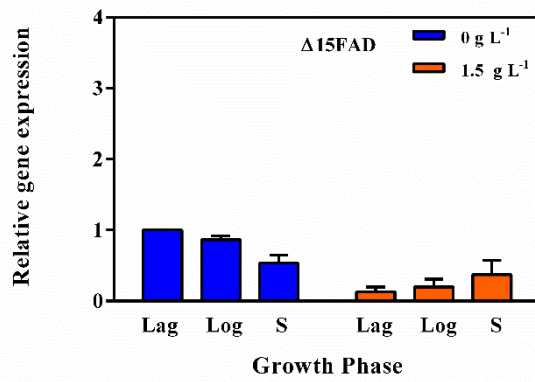

Supplement: rsos181236supp4.pdf [file rsos181236supp4.pdf]
