# Supplementary material for: Variation of fatty acid desaturation in response to different nitrate levels in Auxenochlorella pyrenoidosa
Source: PubMed Central journal article supplement (PMC6281909; doi:10.1098/rsos.181236), 2018-11-28
Supplement: rsos181236supp1.pdf [file rsos181236supp1.pdf]

# <Supporting Information>

## **Variation of fatty acid desaturation in response to different nitrate levels in *Auxenochlorella pyrenoidosa***

Qi Zhang,<sup>ab</sup> Zaizhi You<sup>ab</sup> and Xiaoling Miao<sup>\*ab</sup>

<sup>a</sup> State Key Laboratory of Microbial Metabolism, School of Life Sciences & Biotechnology, Shanghai Jiao Tong University, 800 Dongchuan Road, Shanghai 200240, China

<sup>b</sup> Biomass Energy Research Center, Shanghai Jiao Tong University, Shanghai 200240, China

\*Corresponding author: Xiaoling Miao

Tel: +86-21-34207028; Fax: +86-21-34207028

E-mail: miaoxiaoling@sjtu.edu.cn

(a) Δ9FAD

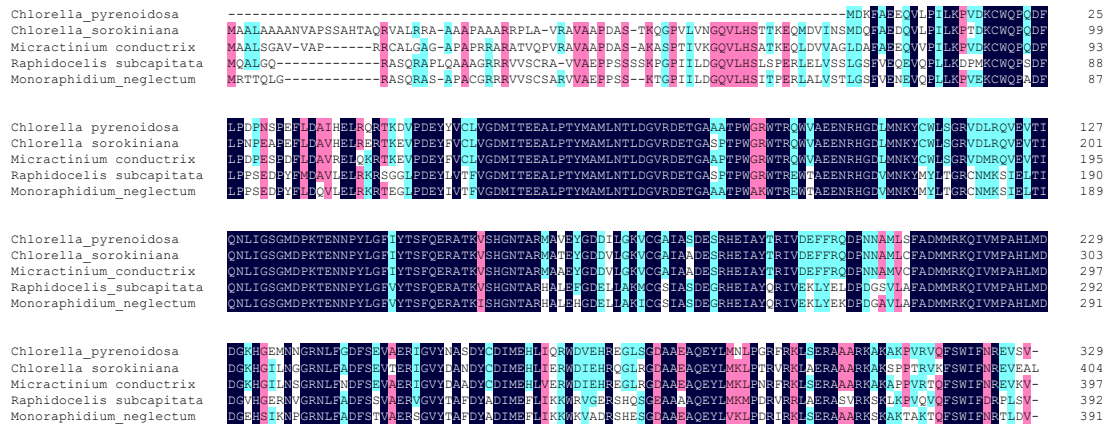

(b) Δ12FAD

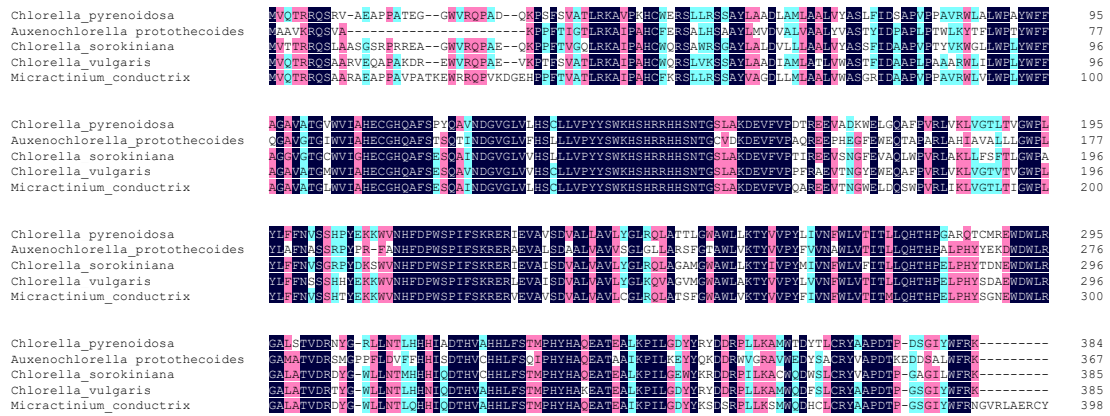

(c) Δ15FAD

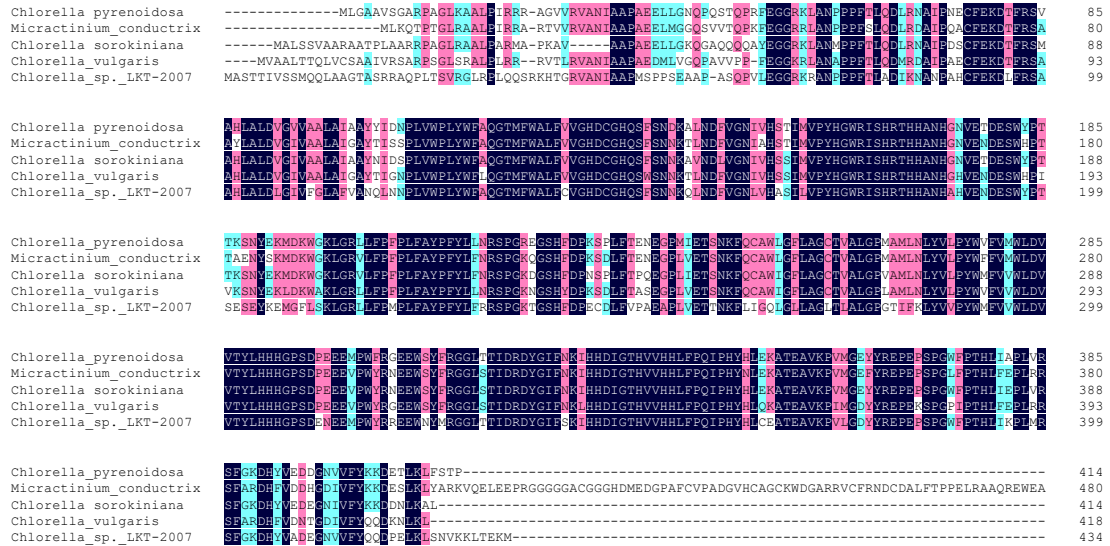

**Figure S1.** Alignment of the deduced amino acid sequences of the Δ9, Δ12 and Δ15 fatty acid desaturase enzyme from *Auxenochlorella pyrenoidosa* (KQ481983.1), *Chlorella vulgaris* (ACF98528.1, BAB78717.1), *Microactinium conductrix* (PSC67766.1, PSC74767.1, PSC71199.1), *Chlorella sorokiniana* (PRW44938.1, PRW57598.1, PRW60085.1), *Monoraphidium neglectum* (XP\_013899493.1), *Raphidocelis subcapitata* (GBF93822.1), *Auxenochlorella protothecoides* (XP\_011396739.1) and *Chlorella* sp. LKT-2007 (ABU54076.2).
