# Supplementary material for: Variation of fatty acid desaturation in response to different nitrate levels in Auxenochlorella pyrenoidosa
Source: PubMed Central journal article supplement (PMC6281909; doi:10.1098/rsos.181236), 2018-11-28
Supplement: rsos181236supp2.pdf [file rsos181236supp2.pdf]

Nitrogen consumption and biomass production of *Auxenochlorella pyrenoidosa* cultivated with different sodium nitrate concentrations of 1.5 g L<sup>-1</sup> (a) and 0 g L<sup>-1</sup> (b).

Residual nitrogen in the medium of *Auxenochlorella pyrenoidosa*.

|    | 0 g L <sup>-1</sup> |       |       | 1.5 g L <sup>-1</sup> |          |          |
|----|---------------------|-------|-------|-----------------------|----------|----------|
| 1  | 0.350               | 0.150 | 0.800 | 289.5049              | 271.0400 | 278.8000 |
| 2  | 0.240               | 0.140 | 0.390 | 284.8275              | 265.2000 | 214.6300 |
| 3  | 0.115               | 0.180 | 0.100 | 283.7324              | 264.3000 | 243.4300 |
| 4  | 0.090               | 0.170 | 0.000 | 282.9538              | 277.4000 | 144.3800 |
| 5  | 0.030               | 0.030 | 0.000 | 280.4270              | 286.0000 | 212.9200 |
| 6  | 0.000               | 0.000 | 0.000 | 277.3757              | 303.8000 | 196.5800 |
| 7  | 0.000               | 0.000 | 0.000 | 232.8758              | 271.4000 | 209.6400 |
| 8  | 0.000               | 0.000 | 0.000 | 227.6463              | 272.4000 | 210.3100 |
| 9  | 0.000               | 0.000 | 0.000 | 226.2052              | 250.4300 | 210.0100 |
| 10 | 0.000               | 0.000 | 0.000 | 224.1224              | 220.4500 | 210.6000 |
| 11 | 0.000               | 0.036 | 0.000 | 219.8219              | 210.0000 | 211.6800 |
| 12 | 0.130               | 0.016 | 0.000 | 219.0323              | 215.6700 | 210.0000 |
| 13 | 0.100               | 0.066 | 0.000 | 217.9032              | 218.2300 | 201.0000 |
| 14 | 0.030               | 0.074 | 0.000 | 203.2258              | 220.2100 | 200.0000 |

Biomass production of *Auxenochlorella pyrenoidosa*.

|    | 0 g L <sup>-1</sup> |           |          | 1.5 g L <sup>-1</sup> |           |          |
|----|---------------------|-----------|----------|-----------------------|-----------|----------|
|    | 0.057000            | 0.0574494 | 0.056500 | 0.0545514             | 0.056580  | 0.065000 |
| 1  | 0.076000            | 0.0872988 | 0.117438 | 0.0815028             | 0.149316  | 0.128450 |
| 2  | 0.154532            | 0.1745286 | 0.160618 | 0.229011              | 0.2632074 | 0.243211 |
| 3  | 0.267554            | 0.2646564 | 0.179745 | 0.408687              | 0.3278328 | 0.377099 |
| 4  | 0.263207            | 0.3805764 | 0.210754 | 0.5819874             | 0.3924582 | 0.487802 |
| 5  | 0.333629            | 0.405789  | 0.192786 | 0.7497816             | 0.4570836 | 0.582857 |
| 6  | 0.356523            | 0.4460712 | 0.204088 | 0.8089008             | 0.579669  | 0.718483 |
| 7  | 0.392748            | 0.397095  | 0.199451 | 0.9132288             | 0.743406  | 0.875265 |
| 8  | 0.401442            | 0.4588224 | 0.204378 | 1.090007              | 0.8483136 | 1.069431 |
| 9  | 0.419410            | 0.4657776 | 0.178586 | 1.143330              | 1.010022  | 1.237515 |
| 10 | 0.457953            | 0.488382  | 0.201770 | 1.247078              | 1.267364  | 1.465588 |
| 11 | 0.460561            | 0.5118558 | 0.186121 | 1.358651              | 1.389660  | 1.519490 |
| 12 | 0.448390            | 0.5379378 | 0.158879 | 1.460081              | 1.476600  | 1.650000 |
| 13 | 0.450708            | 0.5472114 | 0.170000 | 1.500364              | 1.575132  | 1.801176 |
| 14 | 0.427524            | 0.550000  | 0.180000 | 1.560000              | 1.580000  | 1.996791 |
