# Supplementary material for: Variation of fatty acid desaturation in response to different nitrate levels in Auxenochlorella pyrenoidosa
Source: PubMed Central journal article supplement (PMC6281909; doi:10.1098/rsos.181236), 2018-11-28
Supplement: rsos181236supp3.pdf [file rsos181236supp3.pdf]

Growth (a) and fatty acid composition (b) of *Auxenochlorella pyrenoidosa* under nitrate absence and nitrate replenishment cultures.

Growth

|     | Nitrate absence |       |       | Nitrate replenishment |        |       |
|-----|-----------------|-------|-------|-----------------------|--------|-------|
|     |                 |       |       |                       |        |       |
| 1.  | 0.206           | 0.273 | 0.200 | 0.220                 | 0.260  | 0.206 |
| 2.  | 0.507           | 0.360 | 0.459 | 0.322                 | 0.403  | 0.507 |
| 3.  | 0.818           | 0.481 | 0.525 | 0.314                 | 0.517  | 0.818 |
| 4.  | 1.218           | 0.520 | 0.632 | 0.480                 | 0.5584 | 1.218 |
| 5.  | 1.305           | 0.560 | 0.570 | 0.497                 | 0.598  | 1.305 |
| 6.  | 1.444           | 0.590 | 0.607 | 0.520                 | 0.653  | 1.444 |
| 7.  | 1.275           | 0.607 | 0.593 | 0.530                 | 0.719  | 1.275 |
| 8.  | 1.488           | 0.593 | 0.610 | 0.550                 | 0.885  | 1.488 |
| 9.  | 1.512           | 0.610 | 0.521 | 1.954                 | 2.028  | 2.893 |
| 10. | 1.590           | 0.521 | 0.601 | 2.860                 | 2.552  | 3.093 |
| 11. | 1.671           | 0.601 | 0.635 | 4.140                 | 2.980  | 3.325 |
| 12. | 1.761           | 0.583 | 0.598 | 4.560                 | 3.390  | 3.603 |
| 13. | 1.793           | 0.590 | 0.603 | 5.136                 | 4.200  | 3.707 |
| 14. | 1.903           | 0.648 | 0.584 | 5.964                 | 5.040  | 4.224 |

fatty acid composition

|         | Nitrate absence |       |          | Nitrate replenishment |       |          |
|---------|-----------------|-------|----------|-----------------------|-------|----------|
|         |                 |       |          |                       |       |          |
| C14:0   | 0.27            | 0.28  | 0.369061 | 0.00                  | 0.29  | 0.536344 |
| C16:0   | 37.69           | 36.58 | 28.75454 | 37.93                 | 35.40 | 38.36301 |
| C16:1   | 0.38            | 0.64  | 0.00     | 1.82                  | 0.00  | 0.00     |
| C16:2   | 0.54            | 0.53  | 7.24042  | 0.00                  | 1.72  | 0.00     |
| C16:3   | 4.69            | 5.03  | 4.564922 | 4.31                  | 8.90  | 10.36323 |
| C17:0   | 0.62            | 0.58  | 1.148675 | 0.00                  | 0.22  | 1.039892 |
| C18:0   | 4.48            | 5.28  | 4.353405 | 9.47                  | 4.97  | 1.816237 |
| C18:1   | 34.25           | 33.67 | 36.4594  | 0.00                  | 0.68  | 0.00     |
| C18:2   | 16.33           | 16.61 | 16.7614  | 17.21                 | 16.94 | 26.44118 |
| C18:3   | 0.00            | 0.00  | 0.00     | 29.23                 | 30.85 | 21.5314  |
| C20-C26 | 0.52            | 0.76  | 0.354171 | 0.00                  | 0.00  | 0.00     |
