# Supplementary material for: Variation of fatty acid desaturation in response to different nitrate levels in Auxenochlorella pyrenoidosa
Source: PubMed Central journal article supplement (PMC6281909; doi:10.1098/rsos.181236), 2018-11-28
Supplement: rsos181236supp5.pdf [file rsos181236supp5.pdf]

Fatty acid profiles analyzed by gas chromatography (GC). *Escherichia coli* cells (a) and *Saccharomyces cerevisiae* cells (b) with  $\Delta 9$ FAD overexpressed.

*Escherichia coli*

|             |           | pET-28a   |           |           | pET28a- $\Delta 9$ FAD |           |  |
|-------------|-----------|-----------|-----------|-----------|------------------------|-----------|--|
| C12:0       | 4.410000  | 3.228237  | 3.490821  | 2.832607  | 3.197542               | 3.422020  |  |
| C14:0       | 8.590000  | 7.376029  | 7.535871  | 5.624025  | 5.939918               | 5.703921  |  |
| C15:0       | 0.460000  | 0.826011  | 0.973984  | 0.061955  | 0.102412               | 0.070891  |  |
| C16:0       | 35.730000 | 39.458210 | 39.107560 | 39.629420 | 38.127110              | 36.117300 |  |
| C16:1       | 3.140000  | 1.705691  | 1.616060  | 10.597290 | 11.220070              | 9.769495  |  |
| C17:0       | 0.480000  | 0.000000  | 0.000000  | 0.129647  | 0.118116               | 0.075321  |  |
| C17:0 cyclo | 19.270000 | 19.284460 | 19.574390 | 8.236806  | 6.661584               | 6.651639  |  |
| C18:0       | 1.610000  | 1.432595  | 1.084018  | 1.850505  | 1.595699               | 1.243465  |  |
| C18:1       | 17.160000 | 14.353310 | 13.459510 | 29.157990 | 31.451750              | 35.688300 |  |
| C18:2       | 0.150000  | 0.121131  | 0.113864  | 0.231069  | 0.209035               | 0.000000  |  |
| C19 cyclo   | 8.960000  | 12.219200 | 13.047640 | 1.651216  | 1.377219               | 1.260634  |  |
| C12:0       | 4.410000  | 3.228237  | 3.490821  | 2.832607  | 3.197542               | 3.422020  |  |
| C14:0       | 8.590000  | 7.376029  | 7.535871  | 5.624025  | 5.939918               | 5.703921  |  |
| C15:0       | 0.460000  | 0.826011  | 0.973984  | 0.061955  | 0.102412               | 0.070891  |  |
| C16:0       | 35.730000 | 39.458210 | 39.107560 | 39.629420 | 38.127110              | 36.117300 |  |

*Saccharomyces cerevisiae*

|         |       | pRS41H   |          |       | pRS41H- $\Delta 9$ FAD |          |  |
|---------|-------|----------|----------|-------|------------------------|----------|--|
| C12:0   | 0.44  | 0.194721 | 0.292694 | 0.10  | 0.00                   | 0.00     |  |
| C14:0   | 0.57  | 0.530074 | 0.461556 | 0.09  | 0.086751               | 0.282762 |  |
| C15:0   | 0.34  | 0.40026  | 0.439041 | 0.11  | 0.113603               | 0.304513 |  |
| C16:0   | 14.99 | 14.80961 | 17.55038 | 12.41 | 9.231476               | 14.99728 |  |
| C16:1   | 36.62 | 41.00    | 38.00    | 38.46 | 32.40                  | 42.22    |  |
| C17:1   | 0.43  | 0.367806 | 0.405268 | 0.12  | 0.00                   | 0.358891 |  |
| C18:0   | 8.59  | 6.436608 | 6.473038 | 5.02  | 5.710096               | 6.329527 |  |
| C18:1   | 37.53 | 34.62787 | 34.7968  | 41.35 | 49.18449               | 35.10    |  |
| C18:2   | 0.08  | 0.108178 | 0.123832 | 0.03  | 0.00                   | 0.097879 |  |
| CFA     | 0.00  | 0.00     | 0.00     | 0.00  | 0.00                   | 0.00     |  |
| C19-C26 | 0.18  | 0.670705 | 1.137003 | 2.17  | 3.455284               | 0.554649 |  |
